# Supplementary material
Source: PubMed Central journal article supplement (PMC3431631)
Supplement: supp_M112.374983_jbc.M112.374983-1.pdf [file supp_M112.374983_jbc.M112.374983-1.pdf]

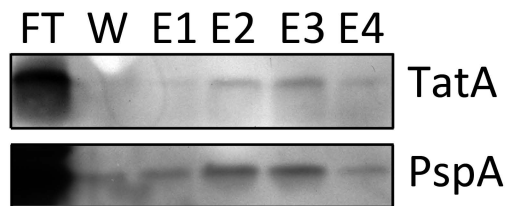

**Supplement Figure S1: Interaction of TatA-strep and PspA at wt-level.**  
TatA-strep that was affinity-purified from strain JARV16 *attB::tatA-strep*, which contains the *tatA-strep* gene under control of its natural *tatA*-promoter. Purification fractions were analyzed by SDS-PAGE and Western-blotting, using antibodies against TatA (upper panel) or PspA (lower panel).

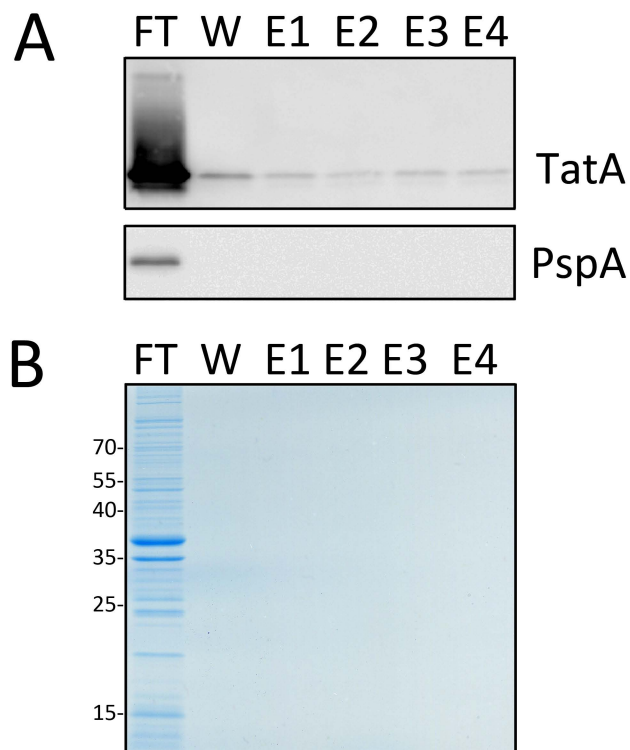

**Supplement Figure S2: Control affinity-purification of TatA without Strep-Tag.** Strep-Tactin matrices were loaded with membrane fractions of MC4100 araR/pBW-*tatA*. FT flow through; E1-E4: elution fractions; PspA and TatA were either detected by immunoblotting (A) or Coomassie-stained (B). Note that only very little non-specifically retarded TatA can be detected by immunoblotting, nothing is detected by Coomassie-stain, and PspA clearly does not bind to Strep-Tactin matrices *per se*.

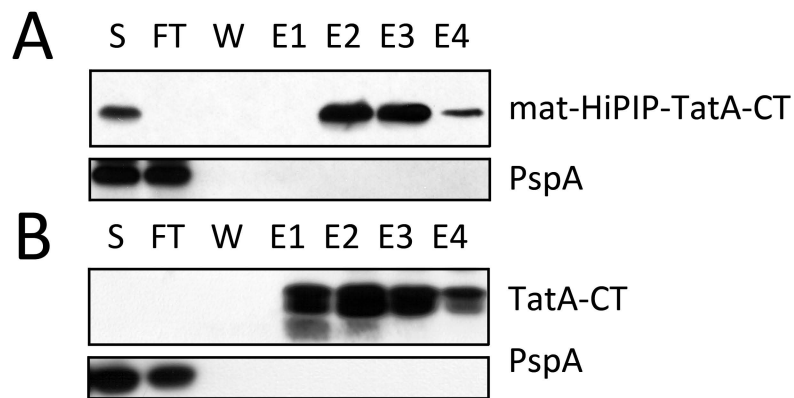

**Figure S3: The hinge-to-the-C-terminus-domain (CT-domain) of TatA alone does not interact with PspA.** (A) *Strep*-Tactin affinity purification of mature HiPIP with the hinge-to-the-C-terminus (CT) domain of TatA (mat-HiPIP-TatA-CT) and detection of the *Strep*-Tag (upper panel) and PspA (lower panel). The strain MC4100 / pBW-*mat-hip-tatA-CT-strep* was used. (B) *Strep*-Tactin affinity purification of the hinge-to-the-C-terminus (CT) domain of TatA (TatA-CT) and detection of the *Strep*-Tag (upper panel) and PspA (lower panel). The strain MC4100 / pBW-*tatA-CT-strep* was used. TatA-CT was below the detection limit in the soluble fraction, but was readily detected after affinity chromatography. S: soluble fraction; FT: flow through; E1-E4: elution fractions; the detected proteins are indicated on the right.
